# Supplementary material for: Activity-Based Anorexia Induces Browning of Adipose Tissue Independent of Hypothalamic AMPK
Source: PubMed Central journal article supplement (PMC8206787; doi:10.3389/fendo.2021.669980), 2021-06-02
Supplement: DataSheet_1.pdf [file DataSheet_1.pdf]

**Supplemental Table 1. Primers and probes for real-time PCR (TaqMan) analysis**

| Gen            | GenBank        | Function | Sequence                                                                   |
|----------------|----------------|----------|----------------------------------------------------------------------------|
| ACC $\alpha$   | NM_022193      | Fw       | 5'-TGGGCGGGATGGTCTCTTT-3'                                                  |
|                |                | Rv       | 5'-AGTCGCAGAAGCAGCCCATT-3'                                                 |
|                |                | Pb       | FAM-5'-<br>ACCTTTGAAGATTTTCGTCAGGATCTTTGATGA-3'-<br>TAMRA                  |
| ADR $\beta$ 1  | NM_012701      | Fw       | 5'-TCTACGTGCCCTGTGCAT-3                                                    |
|                |                | Rv       | 5'-GCTGTCGATCTTCTTCACCTGTTT-3'                                             |
|                |                | Pb       | FAM-5'-TGTACCTCCGGGTGTTCCGCGA-3'-TAMRA                                     |
| ADR $\beta$ 2  | NM_012492      | Fw       | 5'-CTTCCAGGTGGCCAAAAG-3'                                                   |
|                |                | Rv       | 5'-GCTGAGTTTTTGGGCATGAA-3'                                                 |
|                |                | Pb       | FAM-5'-TGCAGAAGATAGACAAATCCGAGGGCAG-<br>3'-TAMRA                           |
| ADR $\beta$ 3  | NM_013108      | Fw       | 5'-CCTTCCCAGCTAGCCCTGTT-3'                                                 |
|                |                | Rv       | 5'-TGCTAGATCTCCATGGTCCTTCA-3'                                              |
|                |                | Pb       | FAM-5'-AACTCACCGCTCAACAGGTTTGATGGC-3'-<br>TAMRA                            |
| ATROGIN-1      | NM_133521.1    | Assay ID | ThermoFisher Taqman Gene Expression Assays<br>Assay ID Rn01504258_m1       |
| C/EBP $\alpha$ | NM_001287579.1 | Fw       | 5'-GTGCGTAAGAGCCGAGATAA-3'                                                 |
|                |                | Rv       | 5'-TGGTCAACTCCAACACCTTCTG-3'                                               |
|                |                | Pb       | FAM-5'-AAACAGCGCAACGTGGAGACGCA-3'                                          |
| C/EBP $\beta$  | NM_024125.5    | Fw       | 5'CAGAGTAGCCCCTTGTCTTTTGG-3'                                               |
|                |                | Rv       | 5'-GGATTGCAGGTCAGACACAGAA-3'                                               |
|                |                | Pb       | FAM-5'-TGAGGATAGCCAGGTCAAAGCCCA-3'                                         |
| CPT1b          | NM_013200.1    | Assay ID | Applied Biosystems TaqMan Gene Expression Assays<br>Assay ID Rn00566242_m1 |
| FAS            | NM_017332      | Fw       | 5'-GACATTTTCATCAGGCCACC-3'                                                 |
|                |                | Rv       | 5'-CCTCTAGCAGCCGCACCTC-3'                                                  |
|                |                | Pb       | FAM-5'-CTGCCCAGGACAGGAACCG-3'-TAMRA                                        |
|                |                | Fw       | 5'-CAC TCT GGT ACC CAG GAC CAA TAA-3'                                      |
| FGF21          | NM_130752      | Rv       | 5'-CCC TCA ACT TTT CTC TGC CTA GGT-3'                                      |
|                |                | Pb       | 5'-ACA AGA GTA GAG GTG GTG GGC AGA ATG<br>CC-3'                            |
| HPRT           | NM_012859      | Fw       | 5'-AGCCGACCGTTCTGTCAT-3'                                                   |
|                |                | Rv       | 5'-GGTCATAACCTGGTTCATCAC-3'                                                |
|                |                | Pb       | FAM-5'-CGACCCTCAGTCCCAGCGTCGTGAT-3'-<br>TAMRA                              |
| HSL            | NM_012859      | Fw       | 5'-CCAAGTGTGTGAGCGCCTATT-3'                                                |
|                |                | Rv       | 5'-TCACGCCCAATGCCTTCT-3'                                                   |
|                |                | Pb       | FAM-5'-<br>AGGGACAGAGACGGAGGACCATTTGACTC-3'-<br>TAMRA                      |
| LPL            | NM_012598      | Fw       | 5'-CTGAAAGTGAGAACATTCCCTTCA-3'                                             |

|               |             |          |                                                                      |
|---------------|-------------|----------|----------------------------------------------------------------------|
|               |             | Rv       | 5'-CCGTGTAAATCAAGAAGGAGTAGGTT-3'                                     |
|               |             | Pb       | FAM-5'-CCTGCCGGAGGTCGCCACAAATA-3'-<br>TAMRA                          |
| MURF-1        | NM_080903.1 | Assay ID | ThermoFisher Taqman Gene Expression Assays<br>Assay ID Rn01639111_m1 |
| PPAR $\gamma$ | NM_013124   | Fw       | 5'-TGGGCCAGAATGGCATCTC-3'                                            |
|               |             | Rv       | 5'-CTGATGCACTGCCTATGAGCACTTACA-3'                                    |
|               |             | Pb       | FAM-5'-CTAACTCCCAGAAAAGCAAGCAA-3'-<br>TAMRA                          |
| SREBP1        | NM_011480   | Fw       | 5'-CTCATCAACAACCAAGACAG-3'                                           |
|               |             | Rv       | 5'- TGTGGCCATGGAGATAGCATCTC-3'                                       |
|               |             | Pb       | FAM-5'-ACCGGCAGCCTTTTTCAAAGGGTTTG-3'-<br>TAMRA                       |

---

**A**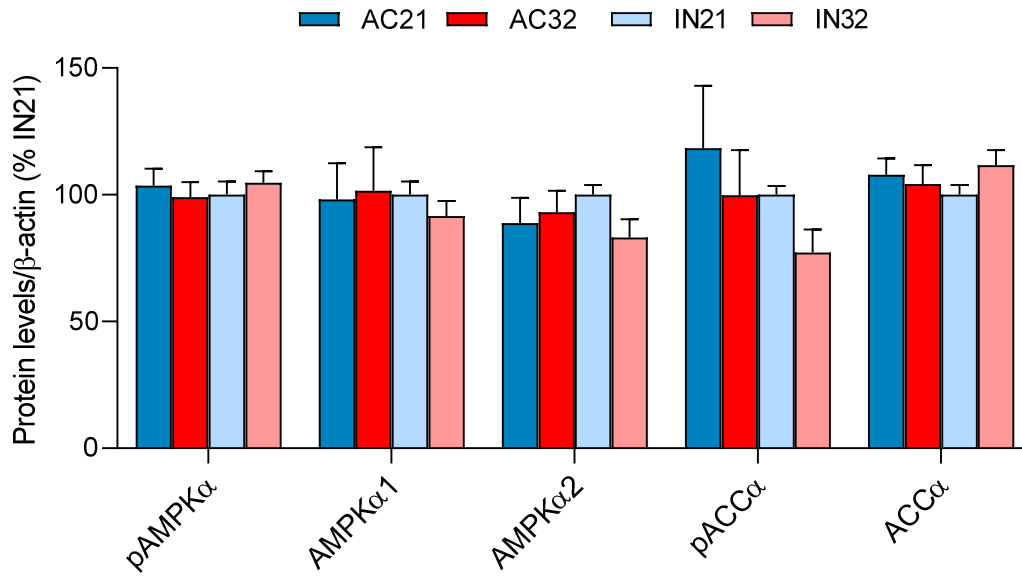**Supplemental Figure 1. Effect of ABA and temperature on hypothalamic AMPK**

(A) Protein levels of AMPK pathway in the hypothalamus (n= 7 rats/group) of active rats at 21°C and 32 °C (AC21 and AC32) and inactive rats at 21°C and 32 °C (IN21 and IN32). Data expressed as mean $\pm$ SEM.
